# Supplementary material
Source: publisher figshare collection journal article supplement (https://osapublishing.figshare.com/ndownloader/files/21943143)
Supplement: Supplementary file 1 [file 21943143]

**Cross-cumulant enhanced radiality nanoscopy for multicolor super-resolution subcellular imaging**

ZHIPING ZENG,1 JING MA,1 CANHUA XU1,*

*1 College of Physics and Information Engineering, Fuzhou University, Fuzhou 350108, China*

**Corresponding author: xucanhua@fzu.edu.cn*

**Supplementary Note 1: Sample preparation and experimental configuration**

For the multicolor CERN imaging of microtubule networks and CCPs, the microtubules and clathrin coated pits (CCPs) of the BS-C-1 cells were labeled with Qdot655 and Qdot705 through the immunostaining method. After immunostaining, the specimen was treated with 0.25 % glutaraldehyde (GA) for 30 min to prevent the aggregation of quantum dots [1]. The expansion microscopy was implemented as described in Ref. [2] through the gelation, digestion and expansion of the specimen. After the expansion of the specimen, wide-field imaging was employed by recording the image sequence using a Nikon Ti-E microscope with a 100 ×/1.49 NA objective and an EMCCD (Andor, DU-897). A 488 nm laser was employed to excite the two types of Qdots for fluorescence emission and an image sequence of 300 frames was sequentially recorded through the wide-field acquisition. For the CERN imaging of densely packed RNA transcripts, as stated in Ref. [5], the dye Alexa 532 was used to label RNA molecules in the nucleus of a HeLa cell. An IX71 microscope with a 100 ×/1.35 NA objective and an EMCCD (Andor, DU885) was used for image sequence recording. A 532 nm laser was employed for the excitation of the fluorescence emission and 100 image frames was utilized for CERN image reconstruction. Subsequently, the potential drift of the collected image sequence was corrected by a subpixel drift correction algorithm [3]. The second-order spatiotemporal cross-cumulant analysis was performed by bSOFI algorithm [4]. The radiality processing was conducted by the NanoJ-SRRF plugin in ImageJ. ThunderSTORM imaging was implemented by the ThunderSTORM plugin in ImageJ. The relevant test data for performing CERN imaging can be available on Github, https://github.com/zhipingzeng/CERN.

**Fig. S1 (a) The simulated 2D array of ring-like structures with varying radii. (b,c) The fluctuating image sequence was first implemented by the SRRF algorithm, then the generated radiality stack was processed by the 2nd & 3rd order SOFI imaging. (d) The CERN imaging of the simulated ring-like structures. Scale bar: 500 nm.**

In Fig. S1, the raw image stack is first evaluated by SRRF with TRA mode to generate a radiality stack. The subsequent cross-cumulant analysis was performed on the radiality stack. As shown in Fig. S1, this SRRF – cumulant method cannot be able to further enhance the reconstructed image resolution. In Figs. S1b & c, we performed the second-order and third-order SOFI imaging on the radiality stack generated from the raw image sequence, the ring-like structures with smaller radii located at the right region cannot be revealed. Whereas, the CERN image shown in Fig. S1d is able to reconstruct the structures with small radii.


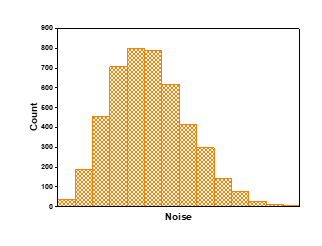


**Fig. S2 The generation of the added noise follows the Poisson distribution.**

**Fig. S3 The FRC maps for TRPPM, TRAC 2, ThunderSTORM and CERN at the central region with densely packed RNA molecules. Image frame numbers for reconstructions: 100 frames for TRPPM, TRAC 2 and CERN, 5000 frames for ThunderSTORM. Thus, ThunderSTORM has lower temporal resolution compared to other 3 approaches. Color bar: 18 - 266 nm.**

**References**

[1] R. Li, X. Chen, Z. Lin, Y. Wang, and Y. Sun, "Expansion enhanced nanoscopy," Nanoscale 10 (2018).

[2] Chozinski T.J., Halpern A.R., Okawa H. et al. “Expansion microscopy with conventional antibodies and fluorescent proteins,” Nat. Methods 13:485-488 (2016).

[3] Guizar S.M., Thurman S.T., Fienup J.R. “Efficient subpixel image registration algorithms,” Opt. Lett. 33:156-158 (2008).

[4] S. Geissbuehler, N. L. Bocchio, C. Dellagiacoma, C. Berclaz, M. Leutenegger, and T. Lasser, "Mapping molecular statistics with balanced super-resolution optical fluctuation imaging (bSOFI)," Optical Nanoscopy 1, 1-7 (2012).

[5] T. Lukeš, J. Pospíšil, K. Fliegel, T. Lasser, and G. M. Hagen, "Quantitative super-resolution single molecule microscopy dataset of YFP-tagged growth factor receptors," Gigascience 7 (2018).
